# Supplementary material for: Transfusion practice patterns in patients with anemia receiving myelosuppressive chemotherapy for nonmyeloid cancer: results from a prospective observational study
Source: Springer Nature journal article supplement (doi:10.1007/s00520-017-4035-7), 2018-01-18
Supplement: MOESM1 [file 15403462]

## ONLINE SUPPLEMENTARY MATERIALS

### Transfusion Practice Patterns in Patients With Anemia Receiving Myelosuppressive Chemotherapy for Nonmyeloid Cancer: Results From a Prospective Observational Study

**Journal:** *Supportive Care in Cancer*

**Authors:** James Granfortuna,<sup>1</sup> Kaye Shoffner,<sup>2</sup> Stephen E. DePasquale,<sup>3</sup> Sejal Badre,<sup>4</sup> Chet Bohac,<sup>4</sup> Cisio De Oliveira Brandao<sup>4</sup>

**Author affiliations:** <sup>1</sup>Cone Health, 1200 N. Elm Street, Greensboro, NC 27401; <sup>2</sup>Alamance Regional Cancer Center, Cone Health, 1240 Huffman Mill Road, Burlington, NC 27215; <sup>3</sup>The University of Tennessee College of Medicine, 960 East Third Street, Chattanooga, TN 37403; <sup>4</sup>Amgen Inc., One Amgen Center Drive, Thousand Oaks, CA 91320

#### **Corresponding author:**

James Granfortuna, MD, FACP

Associate Clinical Professor of Medicine

Cone Health

1200 N. Elm Street

Greensboro, NC 27401

USA

Phone: +1 336-312-4050

E-mail: [James.Granfortuna@conehealth.com](mailto:James.Granfortuna@conehealth.com)

## **Contents**

Online Resource 1. Study survey/questionnaire

Online Resource 2. Characteristics of enrolling sites

Online Resource 3. Proportions of patients with specific signs and symptoms of anemia, and signs and symptoms of anemia affecting the decision to prescribe a PRBC transfusion

Online Resource 4. Primary clinical considerations for prescribing a PRBC transfusion stratified by sex and age

Online Resource 5. Primary clinical considerations for prescribing a PRBC transfusion stratified by primary tumor type

Online Resource 6. Primary clinical considerations for prescribing a PRBC transfusion stratified by chemotherapy type and line

Online Resource 7. Primary clinical considerations for prescribing a PRBC transfusion stratified by site type

## Online Resource 1. Study survey/questionnaire

### Appendix C. Sample CRF

Site Attributes: ESA Use:  Yes  No  Academic  Non-academic

Subject age:  years Subject sex:  Male  Female  DD/ MM/YY  
Date of diagnosis for cancer

Primary solid tumor type:  Anal cancer  Melanoma skin cancer  
 Bladder cancer  Non-melanoma skin cancer  
Stage of primary solid tumor:  Bone/sarcoma  Ovarian cancer  
 Stage IV (non-curative)  Brain cancer  Pancreatic cancer  
 Stage IV (curative)  Breast cancer  Prostate cancer  
 Cervical cancer  Rectal cancer  
 Colon cancer  Renal cancer  
 Esophageal cancer  Stomach cancer  
\*If SCLC, specify:  Head & neck cancer  Testicular cancer  
 Extensive  Intestine cancer  Thyroid cancer  
 Limited  Liver cancer  Uterine cancer  
 Unknown  Small cell lung cancer\*  Other: \_\_\_\_\_  
 Non-small cell lung cancer

Chemotherapy Treatment:  DD/ MM/YY  
Date of last cycle chemotherapy  
 Platinum  Non-platinum

If a standard regimen was given, which of the following regimens was used?

- Cyclophosphamide + Doxorubicin
- Cyclophosphamide + Epirubicin
- Cyclophosphamide + Docetaxel+ Doxorubicin
- Cyclophosphamide + Docetaxel+ Trastuzumab
- Cyclophosphamide + 5-Fluorouracil + Doxorubicin
- Cyclophosphamide + 5-Fluorouracil + Epirubicin
- Cyclophosphamide + 5-Fluorouracil + Methotrexate
- Docetaxel + Doxorubicin
- Docetaxel + Gemcitabine
- Dose dense Doxorubicin + Cyclophosphamide + Docetaxel

If a standard regimen was **not** given, which of the following agents was given to the subject?  
(Check all that apply)

- S-FU
- Bevacizumab
- Capecitabine
- Cyclophosphamide
- Docetaxel
- Doxorubicin
- Epirubicin
- Gemcitabine
- Lapatinib
- Methotrexate
- Paclitaxel
- Trastuzumab
- Vinorelbine
- Other if Other, specify \_\_\_\_\_

Anemia relevant co-morbidities?

Yes  None

- Congestive heart failure or coronary heart disease
- Chronic pulmonary disease
- Cerebral vascular disease

Last hemoglobin value prior transfusion:

g/dL

Date of hemoglobin draw

Where there any signs/symptoms related to anemia?

Yes  No → asymptomatic

- Sustained tachycardia \_\_\_\_\_
- Tachypnea \_\_\_\_\_
- Chest pain/pectoral angina \_\_\_\_\_
- Postural hypotension \_\_\_\_\_
- Dyspnea on exertion \_\_\_\_\_
- Lightheadedness \_\_\_\_\_
- Syncope \_\_\_\_\_
- Fatigue \_\_\_\_\_
- Pallor \_\_\_\_\_

If there are multiple symptoms, please mark the most important sign or symptom with an X

Please order from 1 to 3 with 1 being the most important trigger and 3 being least important trigger for RBC transfusion

- Low hemoglobin
- Medical history
- Anemia symptoms

PRBC Transfusion:

Date of transfusion

units

5-FU = 5-fluorouracil; CRF = case report form; ESA = erythropoiesis-stimulating agent; PRBC = packed red blood cell; RBC = red blood cell; SCLC = small cell lung cancer.

**Online Resource 2. Characteristics of enrolling sites**

| <b>Characteristic</b>                                  | <b>Recruited Study Sites<br/>N = 25<br/>n (%)</b> | <b>Study Sites That<br/>Enrolled Patients<br/>N = 18<br/>n (%)</b> |
|--------------------------------------------------------|---------------------------------------------------|--------------------------------------------------------------------|
| Location of site                                       |                                                   |                                                                    |
| Urban                                                  | 11 (44.0)                                         | 10 (55.6)                                                          |
| Suburban                                               | 10 (40.0)                                         | 4 (22.2)                                                           |
| Rural                                                  | 4 (16.0)                                          | 4 (22.2)                                                           |
| Site type                                              |                                                   |                                                                    |
| Academic                                               | 2 (8.0)                                           | 2 (11.1)                                                           |
| Nonacademic                                            | 23 (92.0)                                         | 16 (88.9)                                                          |
| Transfusion center on site                             |                                                   |                                                                    |
| Yes                                                    | 9 (36.0)                                          | 8 (44.4)                                                           |
| No                                                     | 16 (64.0)                                         | 10 (55.6)                                                          |
| Routine usage of erythropoiesis-<br>stimulating agents |                                                   |                                                                    |
| Yes                                                    | 18 (72.0)                                         | 12 (66.7)                                                          |
| No                                                     | 7 (28.0)                                          | 6 (33.3)                                                           |

**Online Resource 3:** Proportions of patients with specific signs and symptoms of anemia, and signs and symptoms of anemia affecting the decision to prescribe a PRBC transfusion. Data are shown as n (%). <sup>a</sup>Patients could be included in > 1 symptom category but were included only once within each category. <sup>b</sup>Not specified. <sup>c</sup>One patient was excluded as the Hb value was measured after a PRBC transfusion. Hb = hemoglobin; PRBC = packed red blood cell.

**a. Signs and symptoms of anemia (N = 147)<sup>a</sup>**

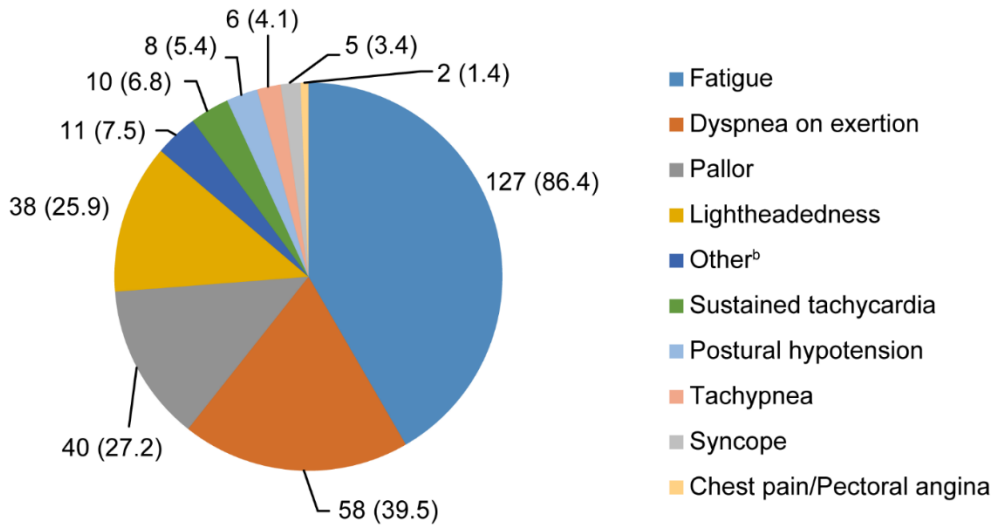

**b. Signs and symptoms of anemia affecting the decision to prescribe a PRBC transfusion (N = 146)<sup>a,c</sup>**

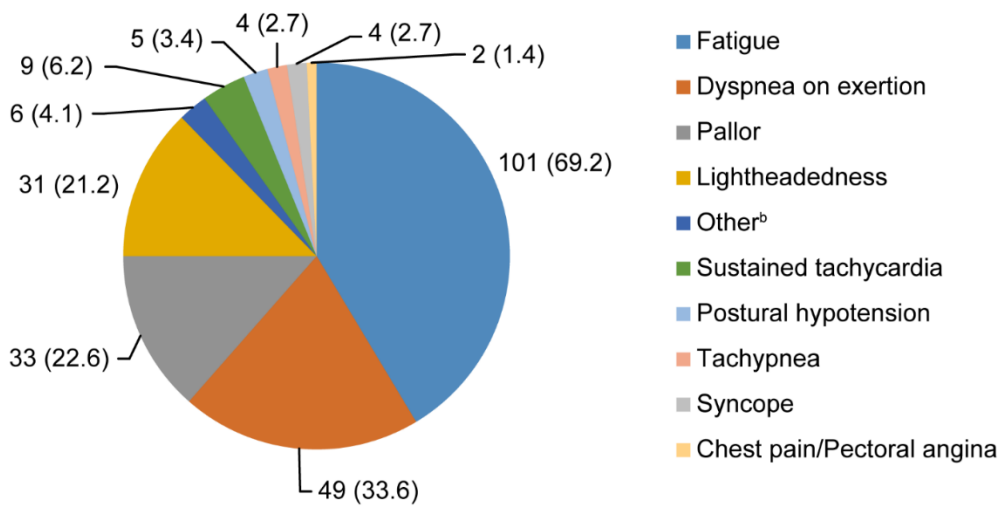

**Online Resource 4.** Primary clinical considerations for prescribing a PRBC transfusion stratified by sex and age

| Baseline Covariate / Primary Clinical Consideration for PRBC Transfusion | Patients Who Received a PRBC Transfusion<br>N = 147 |            |
|--------------------------------------------------------------------------|-----------------------------------------------------|------------|
|                                                                          | n (%)                                               | 95% CI (%) |
| Sex                                                                      |                                                     |            |
| Female                                                                   |                                                     | n = 100    |
| Anemia symptoms                                                          | 76 (76.0)                                           | 66.4, 84.0 |
| Hb value                                                                 | 23 (23.0)                                           | 15.2, 32.5 |
| Medical history                                                          | 1 (1.0)                                             | 0.0, 5.4   |
| Male                                                                     |                                                     | n = 47     |
| Anemia symptoms                                                          | 30 (63.8)                                           | 48.5, 77.3 |
| Hb value                                                                 | 14 (29.8)                                           | 17.3, 44.9 |
| Medical history                                                          | 3 (6.4)                                             | 1.3, 17.5  |
| Age                                                                      |                                                     |            |
| < 65 years                                                               |                                                     | n = 66     |
| Anemia symptoms                                                          | 53 (80.3)                                           | 68.7, 89.1 |
| Hb value                                                                 | 12 (18.2)                                           | 9.8, 29.6  |
| Medical history                                                          | 1 (1.5)                                             | 0.0, 8.2   |
| ≥ 65 years                                                               |                                                     | n = 81     |
| Anemia symptoms                                                          | 53 (65.4)                                           | 54.0, 75.7 |
| Hb value                                                                 | 25 (30.9)                                           | 21.1, 42.1 |
| Medical history                                                          | 3 (3.7)                                             | 0.8, 10.4  |

Physicians selected the “most important (primary) consideration,” “second-most important consideration,” or “least important consideration” from the list of 3 considerations of anemia symptoms, Hb value, or medical history (including comorbidities).

CI = confidence interval; Hb = hemoglobin; PRBC = packed red blood cell.

**Online Resource 5.** Primary clinical considerations for prescribing a PRBC transfusion by primary tumor type

| Baseline Covariate / Primary Clinical Consideration for PRBC Transfusion | Patients Who Received a PRBC Transfusion<br>N = 147 |            |
|--------------------------------------------------------------------------|-----------------------------------------------------|------------|
|                                                                          | n (%)                                               | 95% CI (%) |
| Gynecological cancer                                                     |                                                     | n = 37     |
| Anemia symptoms                                                          | 26 (70.3)                                           | 53.0, 84.1 |
| Hb value                                                                 | 10 (27.0)                                           | 13.8, 44.1 |
| Medical history                                                          | 1 (2.7)                                             | 0.1, 14.2  |
| Non-small cell lung cancer                                               |                                                     | n = 30     |
| Anemia symptoms                                                          | 23 (76.7)                                           | 57.7, 90.1 |
| Hb value                                                                 | 7 (23.3)                                            | 9.9, 42.3  |
| Medical history                                                          | 0                                                   |            |
| Small cell lung cancer                                                   |                                                     | n = 24     |
| Anemia symptoms                                                          | 18 (75.0)                                           | 53.3, 90.2 |
| Hb value                                                                 | 5 (20.8)                                            | 7.1, 42.2  |
| Medical history                                                          | 1 (4.2)                                             | 0.1, 21.1  |
| Gastrointestinal cancer                                                  |                                                     | n = 10     |
| Anemia symptoms                                                          | 9 (90.0)                                            | 55.5, 99.7 |
| Hb value                                                                 | 1 (10.0)                                            | 0.3, 44.5  |
| Medical history                                                          | 0                                                   |            |
| Breast cancer                                                            |                                                     | n = 14     |
| Anemia symptoms                                                          | 9 (64.3)                                            | 35.1, 87.2 |
| Hb value                                                                 | 5 (35.7)                                            | 12.8, 64.9 |
| Medical history                                                          | 0                                                   |            |
| Urogenital cancer                                                        |                                                     | n = 7      |
| Anemia symptoms                                                          | 6 (85.7)                                            | 42.1, 99.6 |
| Hb value                                                                 | 0                                                   |            |
| Medical history                                                          | 1 (14.3)                                            | 0.4, 57.9  |
| Other <sup>a</sup>                                                       |                                                     | n = 25     |
| Anemia symptoms                                                          | 15 (60.0)                                           | 38.7, 78.9 |
| Hb value                                                                 | 9 (36.0)                                            | 18.0, 57.5 |
| Medical history                                                          | 1 (4.0)                                             | 0.1, 20.4  |

Physicians selected the “most important (primary) consideration,” “second-most important consideration,” or “least important consideration” from the list of 3 considerations of anemia symptoms, Hb value, or medical history (including comorbidities).

<sup>a</sup>Includes bone/sarcoma, brain, head and neck, skin, thyroid, hematological cancers, other gastrointestinal cancers, and missing.

CI = confidence interval; Hb = hemoglobin; PRBC = packed red blood cell.



**Online Resource 6.** Primary clinical considerations for prescribing a PRBC transfusion by chemotherapy type and line

| Baseline Covariate / Primary Clinical Consideration for PRBC Transfusion | Patients Who Received a PRBC Transfusion<br>N = 147 |            |
|--------------------------------------------------------------------------|-----------------------------------------------------|------------|
|                                                                          | n (%)                                               | 95% CI (%) |
| Chemotherapy type                                                        |                                                     |            |
| Platinum                                                                 |                                                     | n = 107    |
| Anemia symptoms                                                          | 79 (73.8)                                           | 64.4, 81.9 |
| Hb value                                                                 | 25 (23.4)                                           | 15.7, 32.5 |
| Medical history                                                          | 3 (2.8)                                             | 0.6, 8.0   |
| Non-platinum                                                             |                                                     | n = 40     |
| Anemia symptoms                                                          | 27 (67.5)                                           | 50.9, 81.4 |
| Hb value                                                                 | 12 (30.0)                                           | 16.6, 46.5 |
| Medical history                                                          | 1 (2.5)                                             | 0.1, 13.2  |
| Chemotherapy line                                                        |                                                     |            |
| First line                                                               |                                                     | n = 95     |
| Anemia symptoms                                                          | 67 (70.5)                                           | 60.3, 79.4 |
| Hb value                                                                 | 26 (27.4)                                           | 18.7, 37.5 |
| Medical history                                                          | 2 (2.1)                                             | 0.3, 7.4   |
| Second line                                                              |                                                     | n = 52     |
| Anemia symptoms                                                          | 39 (75.0)                                           | 61.1, 86.0 |
| Hb value                                                                 | 11 (21.2)                                           | 11.1, 34.7 |
| Medical history                                                          | 2 (3.8)                                             | 0.5, 13.2  |

Physicians selected the “most important (primary) consideration,” “second-most important consideration,” or “least important consideration” from the list of 3 considerations of anemia symptoms, Hb value, or medical history (including comorbidities).

CI = confidence interval; Hb = hemoglobin; PRBC = packed red blood cell.

**Online Resource 7.** Primary clinical considerations for prescribing a PRBC transfusion by site type

| Baseline Covariate / Primary Clinical Consideration for PRBC Transfusion | Patients Who Received a PRBC Transfusion<br>N = 147 |         |            |
|--------------------------------------------------------------------------|-----------------------------------------------------|---------|------------|
|                                                                          | n (%)                                               |         | 95% CI (%) |
| Academic                                                                 |                                                     | n = 40  |            |
| Anemia symptoms                                                          | 30 (75.0)                                           |         | 58.8, 87.3 |
| Hb value                                                                 | 8 (20.0)                                            |         | 9.1, 35.6  |
| Medical history                                                          | 2 (5.0)                                             |         | 0.6, 16.9  |
| Nonacademic                                                              |                                                     | n = 107 |            |
| Anemia symptoms                                                          | 76 (71.0)                                           |         | 61.5, 79.4 |
| Hb value                                                                 | 29 (27.1)                                           |         | 19.0, 36.6 |
| Medical history                                                          | 2 (1.9)                                             |         | 0.2, 6.6   |

Physicians selected the “most important (primary) consideration,” “second-most important consideration,” or “least important consideration” from the list of 3 considerations of anemia symptoms, Hb value, or medical history (including comorbidities).

CI = confidence interval; Hb = hemoglobin; PRBC = packed red blood cell.
